# Supplementary material
Source: Springer Nature journal article supplement (https://www.springermedizin.de/resource/supplementary/12913_2007_577_MOESM2_ESM.pdf/9535904)
Supplement: MOESM2 [file 9535904]

| Time line                  | Intervention group | Control group |
|----------------------------|--------------------|---------------|
| Randomisation              |                    |               |
|                            | (A) (B)            | (A)           |
| Baseline (T 0)             | (C) (D) (E)        | (C) (D) (E)   |
| Intervention               |                    |               |
| <i>First consultation</i>  | (F) (G) (H)        | (F) (I)       |
| <i>Second consultation</i> | (J)                |               |
| <i>Telephone call</i>      | (K)                |               |
|                            | (L)                | (L)           |
| 12 weeks (T1)              | (D) (M)            | (D) (M)       |
| 52 weeks (T2)              | (D)                | (D)           |

|     |                                                                                                                                                                                                            |
|-----|------------------------------------------------------------------------------------------------------------------------------------------------------------------------------------------------------------|
| (A) | Training (2 hours) of nurses in Dutch national guideline for cardiovascular risk management (CVRM) and in identification of patients for a risk assessment                                                 |
| (B) | Training (2 days) of nurses in risk communication, use of risk communication tool, handing over a decision aid and the use of adapted Motivational Interviewing                                            |
| (C) | Recruitment of patients by GP or practice nurse                                                                                                                                                            |
| (D) | Completion of questionnaire by patient (At T0: will be handed over to patient by recruitment. At T1 and T2: will be sent to home address of patient)                                                       |
| (E) | Completion of informed consent form by patient (will be handed over to patient by recruitment)                                                                                                             |
| (F) | Completion of cardiovascular risk profile of patient by nurse in first consultation                                                                                                                        |
| (G) | Nurse will explain cardiovascular risk to patient                                                                                                                                                          |
| (H) | Nurse will hand over decision aid and will invite patient for second consultation                                                                                                                          |
| (I) | Nurse will apply usual care                                                                                                                                                                                |
| (J) | In a second consultation (approx. 2 weeks after first consultation) the nurse will discuss the risk and possible options for risk reduction with the patient by means of adapted motivational interviewing |
| (K) | Nurse will discuss in telephone call (approx. 2 weeks after second consultation) the possible options for risk reduction by means of adapted motivational interviewing                                     |
| (L) | After the consultations, the nurses will complete the recording form about the consultations (for process evaluation) and about the patient's risk profile and will send it to researchers                 |
| (M) | Step counter: counts the total number of steps per day, during 3 days (will be sent to home address of patient)                                                                                            |
